# Supplementary material for: Two porous-layered borates built by B7O13(OH) clusters and AlO4/GaO4 tetrahedra
Source: Royal Society of Chemistry journal article supplement (doi:10.1039/d2ce01336c), 2022-01-01
Supplement: d2ce01336c1.pdf [file d2ce01336c1.pdf]

## Supporting Information

### Two porous-layered borates built by B<sub>7</sub>O<sub>13</sub>(OH) clusters and AlO<sub>4</sub>/GaO<sub>4</sub> tetrahedra

Ya-Zhuo Dong,<sup>a</sup> Chong-An Chen,<sup>a</sup> Juan Chen,<sup>a</sup> Jian-Wen Cheng<sup>\*b</sup> Jin-Hua Li,<sup>\*c</sup> and Guo-Yu Yang<sup>\*a</sup>

<sup>a</sup>MOE Key Laboratory of Cluster Science, School of Chemistry and Chemical Engineering, Beijing Institute of Technology, Beijing 100081, China. \*E-mail: ygy@bit.edu.cn.

<sup>b</sup>Key Laboratory of the Ministry of Education for Advanced Catalysis Materials, Institute of Physical Chemistry, Zhejiang Normal University, Jinhua, Zhejiang 321004, China. \*E-mail: jwcheng@zjnu.cn.

<sup>c</sup>School of Chemistry and Chemical Engineering, Qingdao University, Qingdao, Shandong 266071, China. \*E-mail: jinhuali1978@163.com.

**Figure S1.** The experimental and simulated PXRD patterns of **1-2**.

**Figure S2.** Two types of 8-R windows in **1** along the *a*-axis.

**Figure S3.** 8-R windows in **1** along the *c*-axis.

**Figure S4.** (a)View of the 3-D B-O framework along the *b*-axis; (b) View of the 2-D alkali metal-oxygen layers; (c) View of the whole structure of **1**.

**Figure S5.** Two types of 8-R windows in **2** along the *b*-axis.

**Figure S6.** (a) View of the 3-D B-O framework along the *b*-axis; (b) View of the 3-D alkali metal-oxygen network; (c) View of the whole structure of **2**.

**Figure S7.** View of eight types of channels A, B, C, D, E, F, G, and H of **1**, showing channels A, B, C and F only built by one type of the window, and channels D, E, G, and H made of two types of windows, respectively.

**Figure S8.** View of eight types of channels A, B, C, D, and E of **1**, showing channels A/B only built by one type of the window, and channels C/D/E made of four/three/two types of windows, respectively.

**Figure S9.** View of the intercommunicated channel systems in Ba[MB<sub>4</sub>O<sub>8</sub>(OH)]·H<sub>2</sub>O (M=Al, Ga) (a); Ba<sub>3</sub>M<sub>2</sub>[B<sub>3</sub>O<sub>6</sub>(OH)]<sub>2</sub>[B<sub>4</sub>O<sub>7</sub>(OH)]<sub>2</sub> (M=Al/Ga) (b); [H<sub>3</sub>O]K<sub>3.52</sub>Na<sub>3.48</sub>{Al<sub>2</sub>[B<sub>7</sub>O<sub>13</sub>(OH)][B<sub>5</sub>O<sub>10</sub>]-[B<sub>3</sub>O<sub>5</sub>]}[CO<sub>3</sub>] (c)

**Figure S10.** IR spectra of **1-2**.

**Figure S11.** TG curves of **1-2**.

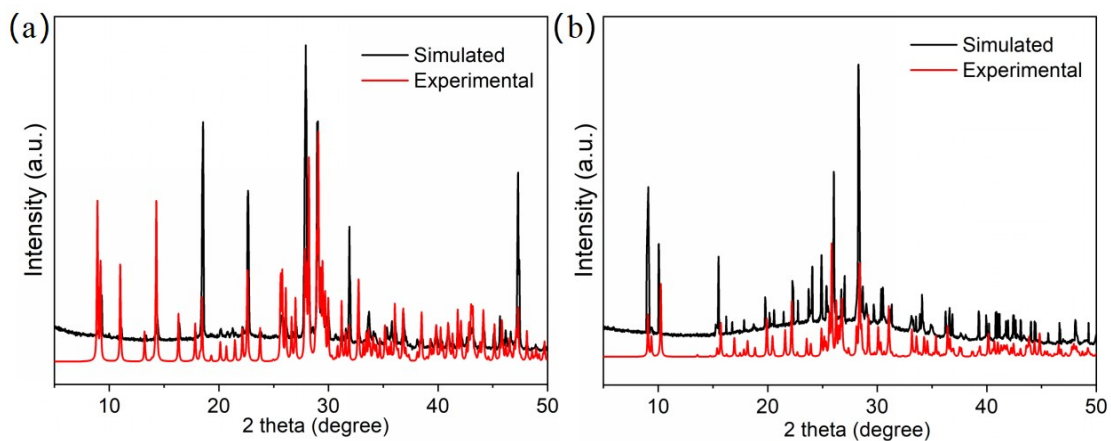

**Figure S1.** The experimental and simulated PXRD patterns of 1-2.

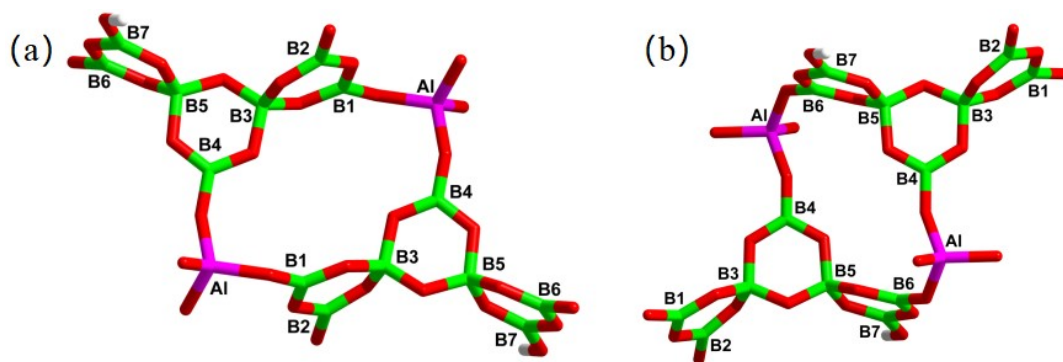

**Figure S2.** Two types of 8-R windows in 1 along the *a*-axis.

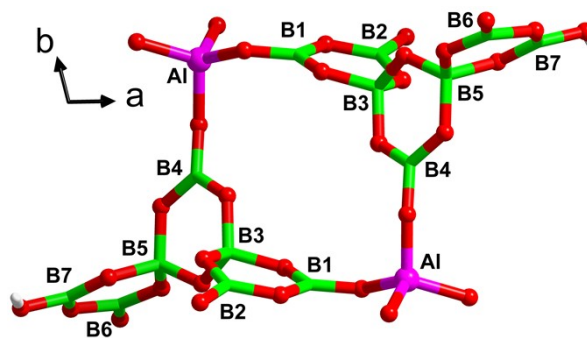

**Figure S3.** 8-R windows in 1 along the *c*-axis.

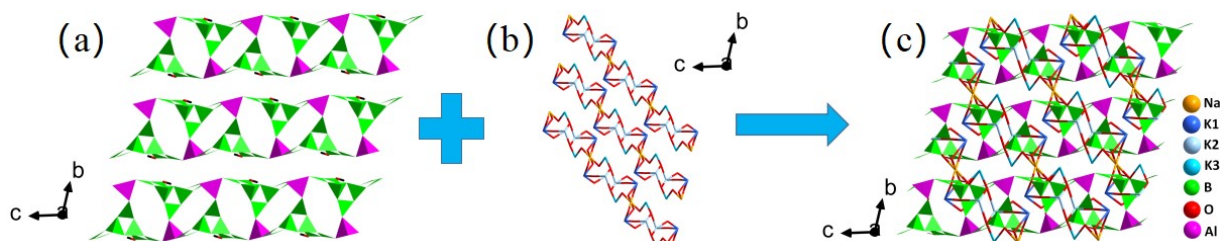

**Figure S4.** (a) View of the 3-D B-O framework along the *b*-axis; (b) View of the 2-D alkali metal-oxygen layers; (c) View of the whole structure of 1.

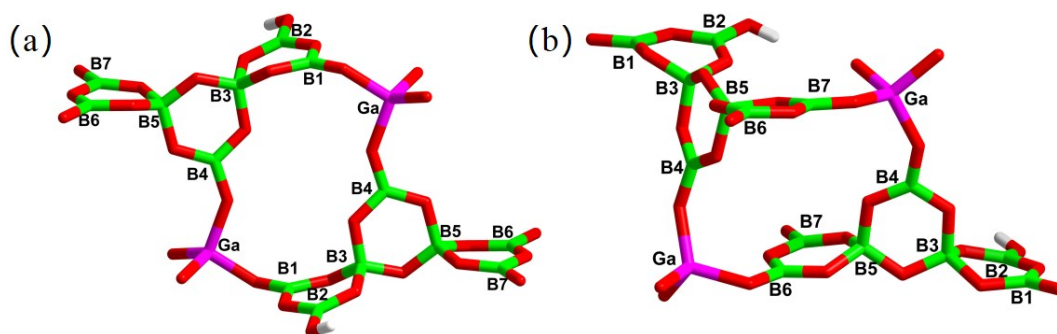

**Figure S5.** Two types of 8-R windows in **2** along the *b*-axis.

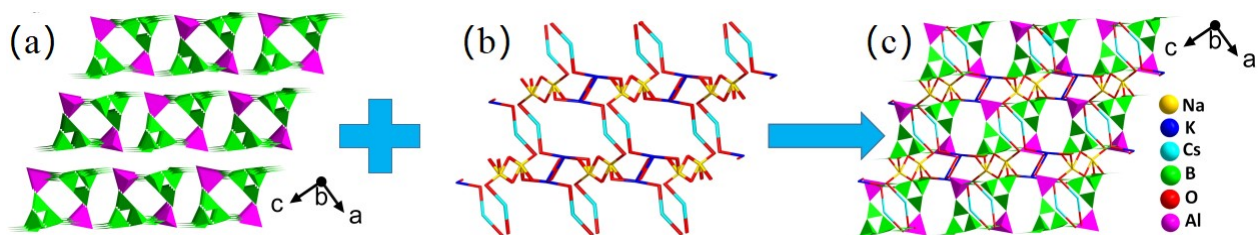

**Figure S6.** (a) View of the 3-D B-O framework along the *b*-axis; (b) View of the 3-D alkali metal-oxygen network; (c) View of the whole structure of **2**.

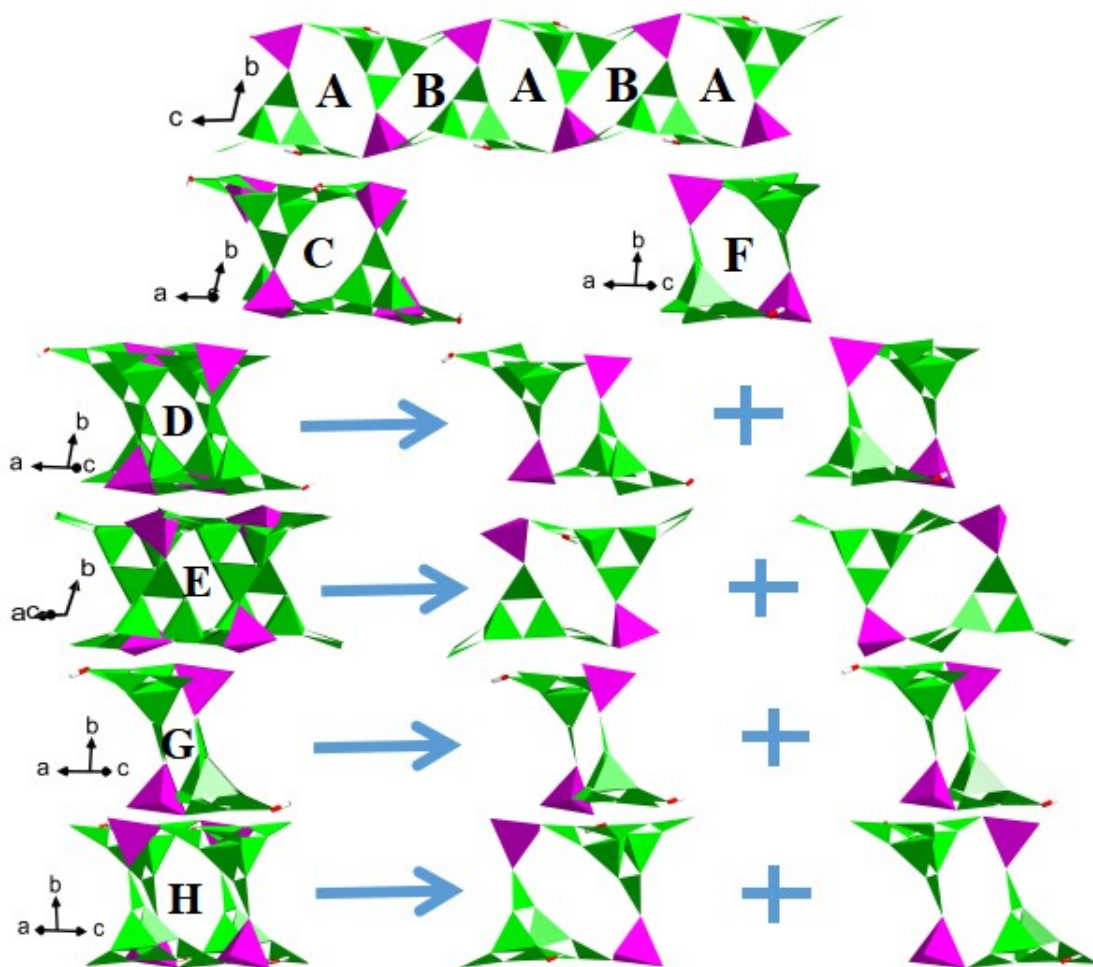

**Figure S7.** View of eight types of channels A, B, C, D, E, F, G, and H of **1**, showing channels A, B, C and F only built by one type of the window, and channels D, E, G, and H made of two types of windows, respectively.

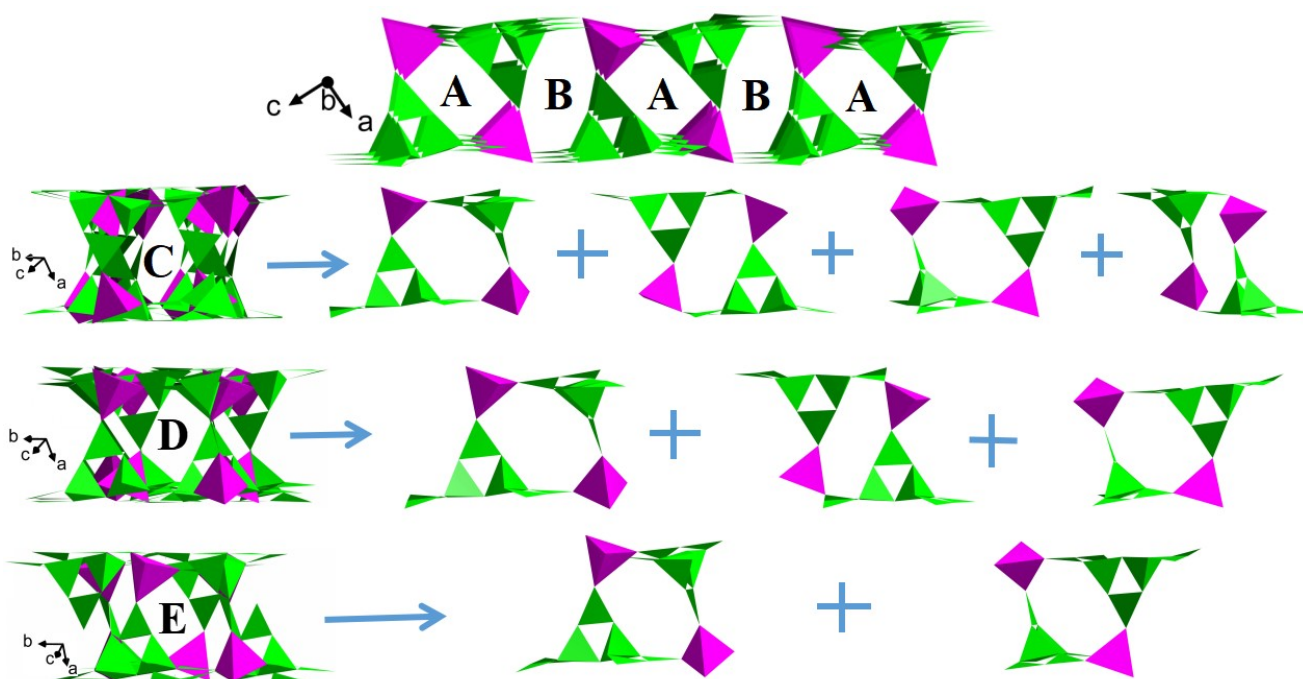

**Figure S8.** View of eight types of channels A, B, C, D, and E of **1**, showing channels A/B only built by one type of the window, and channels C/D/E made of four/three/two types of windows, respectively.

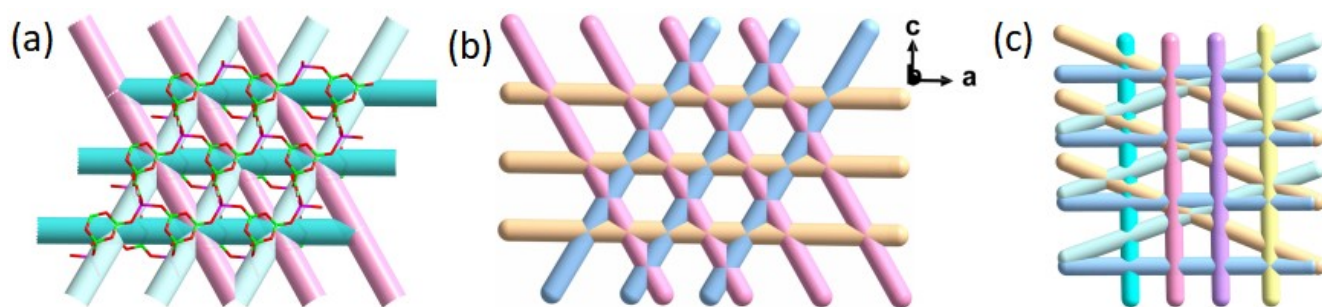

**Figure S9.** View of the intercommunicated channel systems in  $\text{Ba}[\text{MB}_4\text{O}_8(\text{OH})]\cdot\text{H}_2\text{O}$  ( $\text{M}=\text{Al}/\text{Ga}$ ) (a);  $\text{Ba}_3\text{M}_2[\text{B}_3\text{O}_6(\text{OH})]_2\text{--}[\text{B}_4\text{O}_7(\text{OH})_2]$  ( $\text{M}=\text{Al}/\text{Ga}$ ) (b);  $[\text{H}_3\text{O}]\text{K}_{3.52}\text{Na}_{3.48}\{\text{Al}_2[\text{B}_7\text{O}_{13}(\text{OH})][\text{B}_5\text{O}_{10}][\text{B}_3\text{O}_5]\}[\text{CO}_3]$  (c), respectively.

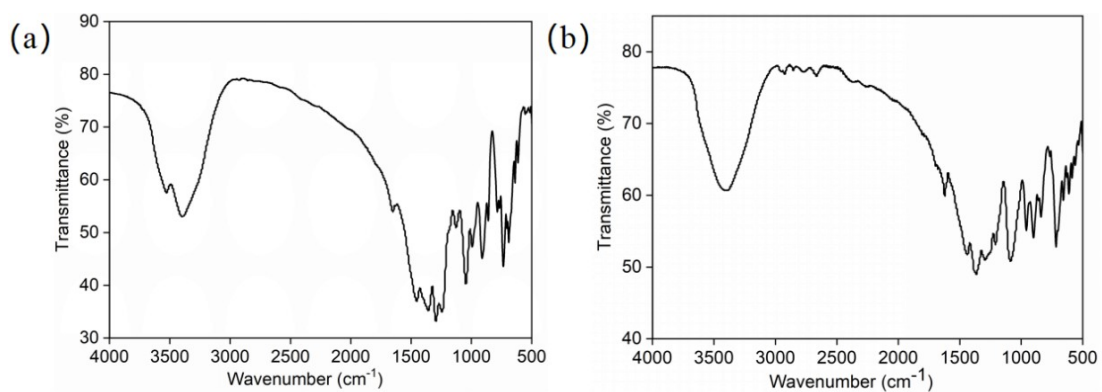

**Figure S10.** IR spectra of **1-2**.

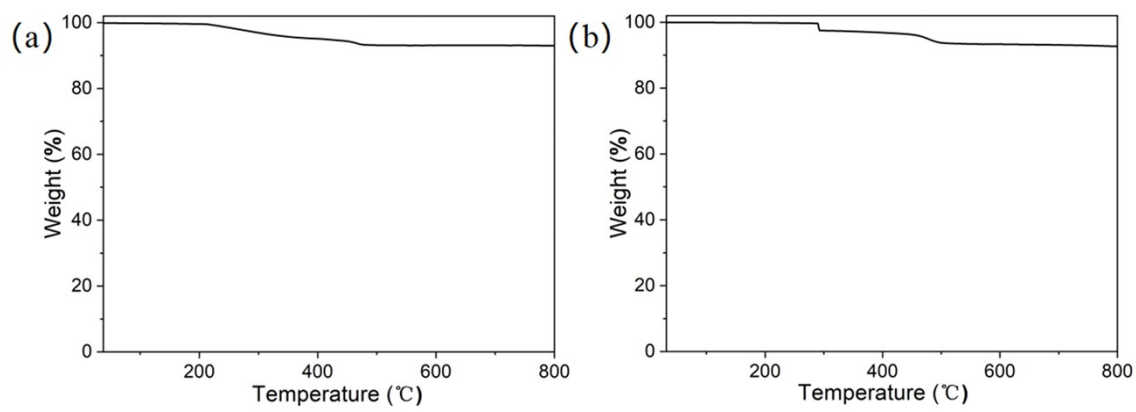

**Figure S11.** TG curves of 1-2.
